# Supplementary material
Source: PubMed Central journal article supplement (PMC9237656)
Supplement: NIHMS1816544-supplement-Supplementary_Tables.pdf [file NIHMS1816544-supplement-Supplementary_Tables.pdf]

Table S1: characteristic of study sample at patient level ( N= 12 per group )

| Variables            | Total<br>N(%) | Periodontal disease |           |           | P<br>value | Cavitated caries |           |           | P<br>value |
|----------------------|---------------|---------------------|-----------|-----------|------------|------------------|-----------|-----------|------------|
|                      |               | S<br>N(%)           | A<br>N(%) | C<br>N(%) |            | S<br>N(%)        | A<br>N(%) | C<br>N(%) |            |
| Age (mean±SD)        | 38.1±13.2     | 40.6±12.1           | 38.2±14.1 | 38.9±17.4 | 0.91       | 38.9±13.6        | 39.9±13.3 | 32.2±7.9  | 0.24       |
| Gender               |               |                     |           |           | 0.01*      |                  |           |           | 0.69       |
| Male                 | 50(69.4)      | 5(41.7)             | 10(83.3)  | 11(91.7)  |            | 9(75.0)          | 7(58.3)   | 8(66.7)   |            |
| Female               | 22(30.6)      | 7(58.3)             | 2(16.7)   | 1(8.3)    |            | 3(25.0)          | 5(41.7)   | 4(33.3)   |            |
| Education            |               |                     |           |           | 0.32       |                  |           |           | 0.09       |
| Bachelor or more     | 49(68.1)      | 11(91.7)            | 9(75.0)   | 8(66.7)   |            | 6(50.0)          | 5(41.7)   | 10(83.3)  |            |
| High school          | 23(31.9)      | 1(8.3)              | 3(25.0)   | 4(33.3)   |            | 6(50.0)          | 7(58.3)   | 2(16.7)   |            |
| Smoker               |               |                     |           |           | 0.43       |                  |           |           | 0.87       |
| Yes                  | 23(31.9)      | 6(50.0)             | 3(25.0)   | 4(33.3)   |            | 3(25.0)          | 4(33.3)   | 3(25.0)   |            |
| No                   | 49(68.1)      | 6(50.0)             | 9(75.0)   | 8(66.7)   |            | 9(75.0)          | 8(66.7)   | 9(75.0)   |            |
| Co-morbid conditions |               |                     |           |           | 0.75       |                  |           |           | 0.15       |
| Diabetes             | 11(15.3)      | 0                   | 2(16.7)   | 2(16.7)   |            | 4(33.3)          | 2(16.7)   | 1(8.3)    |            |
| Hypertension         | 8(11.1)       | 0                   | 1(8.3)    | 1(8.3)    |            | 4(33.3)          | 2(16.7)   | 0         |            |

S: symptomatic , A: asymptomatic , C: control

\*p value < 0.05

Table S2: characteristics of study sample at tooth/sites level ( N= 48 per periodontal disease group and N=12 per cavitated caries group)

| Variables                   | Periodontal disease |           |           |            | Cavitated caries |           |           |            |
|-----------------------------|---------------------|-----------|-----------|------------|------------------|-----------|-----------|------------|
|                             | S<br>N(%)           | A<br>N(%) | C<br>N(%) | P<br>value | S<br>N(%)        | A<br>N(%) | C<br>N(%) | P<br>value |
| Tooth                       |                     |           |           | 0.03*      |                  |           |           | 0.63       |
| Lower first PM              | 4(8.3)              | 6(12.5)   | 3(6.3)    |            | 3(25.0)          | 4(33.3)   | 3(25.0)   |            |
| Lower first M               | 12(25.0)            | 6(12.5)   | 6(12.5)   |            | 3(25.0)          | 2(16.7)   | 2(16.7)   |            |
| Lower 3 <sup>rd</sup> M     | 0                   | 1(2.1)    | 0         |            | 2(16.7)          | 1(8.3)    | 3(25.0)   |            |
| Lower canine                | 3(6.3)              | 0         | 8(16.7)   |            | 1(8.3)           | 1(8.3)    | 0         |            |
| Lower 2 <sup>nd</sup> PM    | 0                   | 3(6.3)    | 3(6.3)    |            | 0                | 1(8.3)    | 0         |            |
| Lower 2 <sup>nd</sup> M     | 0                   | 4(8.3)    | 1(2.1)    |            | 2(16.7)          | 0         | 0         |            |
| Lower lateral               | 2(4.2)              | 5(10.4)   | 5(10.4)   |            | 1(8.3)           | 0         | 0         |            |
| Lower central               | 0                   | 1(2.1)    | 0         |            | 0                | 0         | 0         |            |
| Upper first PM              | 13(27.1)            | 7(14.6)   | 4(8.3)    |            | 0                | 1(8.3)    | 1(8.3)    |            |
| Upper 2 <sup>nd</sup> PM    | 2(4.2)              | 2(4.2)    | 2(4.2)    |            | 0                | 0         | 1(8.3)    |            |
| Upper 1 <sup>st</sup> molar | 6(12.5)             | 5(10.4)   | 3(6.3)    |            | 0                | 1(8.3)    | 2(16.7)   |            |
| Upper 2 <sup>nd</sup> M     | 1(2.1)              | 1(2.1)    | 0         |            | 0                | 0         | 0         |            |
| Upper lateral               | 3(6.3)              | 6(12.5)   | 11(22.9)  |            | 0                | 1(8.3)    | 0         |            |
| Upper canine                | 2(4.2)              | 1(2.1)    | 2(4.2)    |            | 0                | 0         | 0         |            |
| Site                        |                     |           |           | 0.24       |                  |           |           | NA         |
| Distobuccal                 | 17(35.4)            | 21(43.8)  | 17(35.4)  |            | -                | -         | -         |            |
| Distolingual                | 7(14.6)             | 11(22.9)  | 3(6.3)    |            | -                | -         | -         |            |
| Mesiolingual                | 22(45.8)            | 15(31.3)  | 22(45.8)  |            | -                | -         | -         |            |
| Mid buccal                  | 2(4.2)              | 1(2.1)    | 2(4.2)    |            | -                | -         | -         |            |
| Mid lingual                 | 0                   | 0         | 4(8.3)    |            | -                | -         | -         |            |
| Probing Depth (mean±SD)     | 3.9±0.7             | 3.9±0.7   | 3.8±0.7   | 0.72       | -                | -         | -         | NA         |

S: symptomatic , A: asymptomatic , C: control

\*p value < 0.05

Table S3: characteristics of positive SARS CoV at periodontal pocket or cavitated caries

lesion (N=6 for periodontal disease group and N=2 for cavitated caries group)

| Variables                | Periodontal disease<br>N(%) | Cavitated caries<br>N(%) |
|--------------------------|-----------------------------|--------------------------|
| Age (mean±SD)            | 39.7±12.9                   | 44.5±7.8                 |
| Gender                   |                             |                          |
| Male                     | 6(100.0)                    | 1(50.0)                  |
| Female                   | 0                           | 1(50.0)                  |
| Education                |                             |                          |
| Bachelor or more         | 1(16.7)                     | 1(50.0)                  |
| High school              | 5(83.3)                     | 1(50.0)                  |
| Smoker                   |                             |                          |
| Yes                      | 1(16.7)                     | 1(50.0)                  |
| No                       | 5(83.3)                     | 1(50.0)                  |
| Co-morbid conditions     |                             |                          |
| Diabetes                 | 1(16.7)                     | 0                        |
| Hypertension             | 2(33.3)                     | 1(50.0)                  |
| Tooth                    |                             |                          |
| Lower 1 <sup>st</sup> M  | 0                           | 2(100.0)                 |
| Upper first PM           | 2(33.3)                     | 0                        |
| Upper 2 <sup>nd</sup> PM | 2(33.3)                     | 0                        |
| Upper lateral            | 2(33.3)                     | 0                        |
| Site                     |                             |                          |
| Mesiobuccal              | 2(33.3)                     | -                        |
| Distolingual             | 1(16.7)                     | -                        |
| Distobuccal              | 3(50.0)                     | -                        |
| Probing depth (mean±SD)  | 3.8±0.4                     | -                        |
